# Supplementary material for: Effects of metal sites and acid sites on the hydrogenolysis of cornstalks in supercritical ethanol during lignin-first fractionation
Source: Royal Society of Chemistry journal article supplement (doi:10.1039/d1se01403j), 2021-01-01
Supplement: d1se01403j1.pdf [file d1se01403j1.pdf]

## Supplementary Material

### **Effects of metal site and acid site on the hydrogenolysis of cornstalk in supercritical ethanol during lignin-first fractionation**

Bowen Luo, Zhixiang Huang, Riyang Shu\*, Yu Cheng, Zhipeng Tian, Chao Wang, Ying Chen\*

*Guangdong Provincial Key Laboratory of Functional Soft Condensed Matter, School of Materials  
and Energy, Guangdong University of Technology, Guangzhou 510006, PR China*

Corresponding author: shuriyang@gdut.edu.cn (Riyang Shu), chenying@gdut.edu.cn (Ying Chen).

**Table S1** The retention rate of cellulose and hemicellulose over different catalysts.

| Catalyst                          | Retention rate (%) |
|-----------------------------------|--------------------|
| Ru/Al <sub>2</sub> O <sub>3</sub> | 74.8               |
| Ru/C                              | 80.4               |
| Ru/C-acid (5)                     | 76.1               |
| Ru/C-acid (10)                    | 69.2               |
| Ru/C-acid (20)                    | 60.5               |

Note: Retention rate is calculated based on the weight change before and after hydrogenolysis reaction. The weight of cellulose and hemicellulose is measured concentrated sulfuric acid hydrolysis according to the National Renewable Energy Laboratory (NREL) procedure.

**Table S2** Acid amount of the different catalysts derived from NH<sub>3</sub>-TPD profiles.

| Catalyst                          | Total acid<br>(mmol g <sup>-1</sup> ) |
|-----------------------------------|---------------------------------------|
| Ru/Al <sub>2</sub> O <sub>3</sub> | 4.78                                  |
| Ru/C                              | 2.19                                  |
| Ru/C-acid (10)                    | 6.44                                  |

**Table S3** The main components of the monomers.<sup>a</sup>

| Component                                       | Yield <sup>b</sup> (wt%)          |             |                |
|-------------------------------------------------|-----------------------------------|-------------|----------------|
|                                                 | Ru/Al <sub>2</sub> O <sub>3</sub> | Ru/C        | Ru/C-acid (10) |
| <b>Phenols</b>                                  | <b>11.6</b>                       | <b>12.5</b> | <b>19.3</b>    |
| Phenol, 4-ethyl-                                | 4.1                               | 3.0         | 4.5            |
| 2,5-Diethylphenol                               | 0.4                               | 1.3         | 1.8            |
| Methyl 4-hydroxybenzoate                        | 0.0                               | 1.0         | 1.7            |
| 3-(4-Hydroxyphenyl) propanoic acid              | 2.9                               | 4.1         | 5.7            |
| Benzenepropanoic acid, 4-hydroxy-, methyl ester | 4.2                               | 3.1         | 5.6            |
| <b>Guaiacols</b>                                | <b>7.3</b>                        | <b>14.7</b> | <b>15.5</b>    |
| Phenol, 2-methoxy-4-methyl-                     | 0.5                               | 0.7         | 0.0            |
| Phenol, 2-methoxy-4-ethyl-                      | 2.6                               | 2.9         | 3.0            |
| Phenol, 2-methoxy-4-propyl-                     | 3.1                               | 9.3         | 9.3            |
| Methyl 3-(4-hydroxy-3-methoxyphenyl) propionate | 1.1                               | 1.8         | 3.2            |
| <b>Hydrogenated products</b>                    | <b>4.8</b>                        | <b>5.7</b>  | <b>3.5</b>     |
| Cyclohexanol                                    | 1.7                               | 2.3         | 0.4            |
| Cyclohexanol, methyl-                           | 1.2                               | 1.5         | 2.1            |
| 2-(2-Methylcyclohexyl)-2-propanol               | 0.0                               | 1.2         | 0.0            |
| Cyclohexanepropionic acid                       | 1.4                               | 0.0         | 0.0            |
| Cyclohexanepropanoic acid, methyl ester         | 0.5                               | 0.7         | 1.0            |
| <b>Other aromatic compounds</b>                 | <b>0.9</b>                        | <b>3.2</b>  | <b>4.6</b>     |
| 1-Propanone, 1-(2,4-dimethoxyphenyl)-           | 0.0                               | 1.7         | 0.7            |
| 1,3-Benzodioxole-5-propanoic acid, ethyl ester  | 0.9                               | 1.5         | 3.9            |
| <b>Total</b>                                    | <b>24.6</b>                       | <b>36.1</b> | <b>42.9</b>    |

<sup>a</sup> Condition: 0.5 g cornstalk, 0.2 g Ru/C-acid (10) catalyst, 15 mL ethanol, 3 MPa H<sub>2</sub>, 260 °C, 4 h.

<sup>b</sup> Measured by GC-MS, where acetophenone was used as internal standard chemical. Components listed were those represented by more than 0.5% of yield determined by GC-MS.

**Table S4** Hydrogenolysis of 4-propyl guaiacol and product distribution over different catalysts.

| Catalyst          | Conversion (%) | Product selectivity (%)                                                           |                                                                                   |                                                                                   |                                                                                   |                                                                                   |                                                                                    |                                    |                                                  |
|-------------------|----------------|-----------------------------------------------------------------------------------|-----------------------------------------------------------------------------------|-----------------------------------------------------------------------------------|-----------------------------------------------------------------------------------|-----------------------------------------------------------------------------------|------------------------------------------------------------------------------------|------------------------------------|--------------------------------------------------|
|                   |                | 1                                                                                 | 2                                                                                 | 3                                                                                 | 4                                                                                 | 5                                                                                 | 6                                                                                  | 2 + 4 + 5<br>Hydrogenated products | 5 + 6 <sup>a</sup><br>-OCH <sub>3</sub> products |
|                   |                | 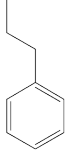 |  |  |  |  |  |                                    |                                                  |
| Ru/C              | 23.8           | 12.1                                                                              | 22.5                                                                              | 2.3                                                                               | 20.4                                                                              | 38.1                                                                              | 4.5                                                                                | 81.0                               | 42.6                                             |
| Ru/C-acid<br>(5)  | 28.4           | 17.9                                                                              | 33.0                                                                              | 3.1                                                                               | 16.5                                                                              | 24.2                                                                              | 5.2                                                                                | 73.7                               | 29.4                                             |
| Ru/C-acid<br>(10) | 35.5           | 20.7                                                                              | 36.7                                                                              | 1.5                                                                               | 15.8                                                                              | 19.3                                                                              | 5.9                                                                                | 71.8                               | 25.2                                             |
| Ru/C-acid<br>(20) | 39.1           | 24.3                                                                              | 41.4                                                                              | 0.8                                                                               | 12.6                                                                              | 10.5                                                                              | 10.3                                                                               | 64.5                               | 20.8                                             |

<sup>a</sup> Compound 6 accounts for the -OCH<sub>3</sub> products due to the existence of -OCH<sub>2</sub>- group.

Condition: 0.1 g 4-propylguaiacol, 0.05 g catalyst, 15 mL ethanol, 3 MPa H<sub>2</sub>, 260 °C, 4 h.

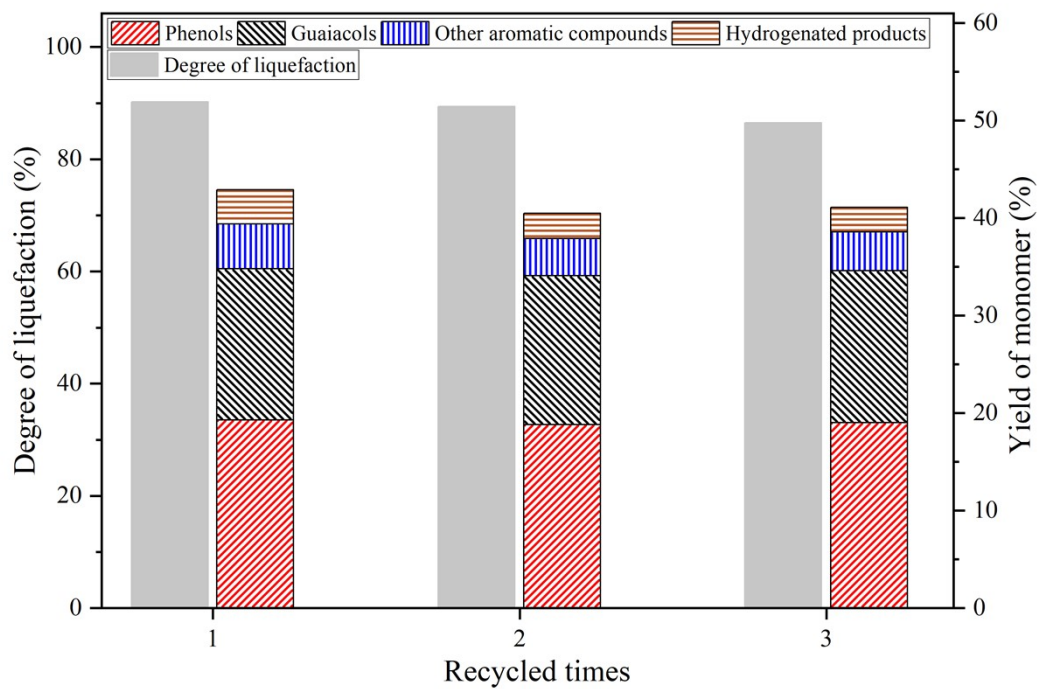

**Fig. S1.** The recyclability of the Ru/C-acid (10) catalyst. Condition: 0.5 g cornstalk, 0.2 g Ru/C-acid (10) catalyst, 15 mL ethanol, 260 °C, 4 h.

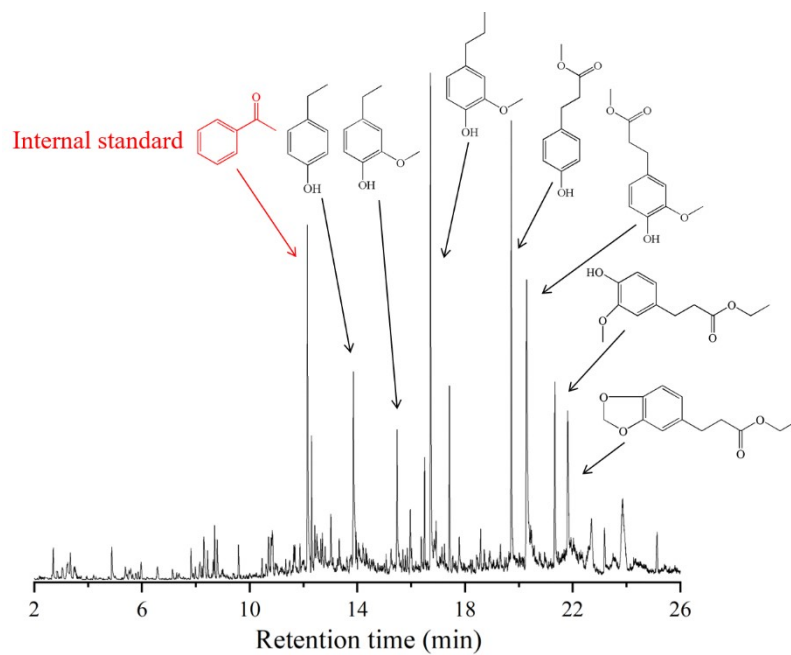

**Fig. S2.** GC-MS chromatogram of the volatile products after hydrogenolysis with Ru/C-acid (10) catalyst.

Condition: 0.5 g cornstalk, 0.2 g Ru/C-acid (10), 15 mL ethanol, 260 °C, 3 MPa H<sub>2</sub>, 4 h.

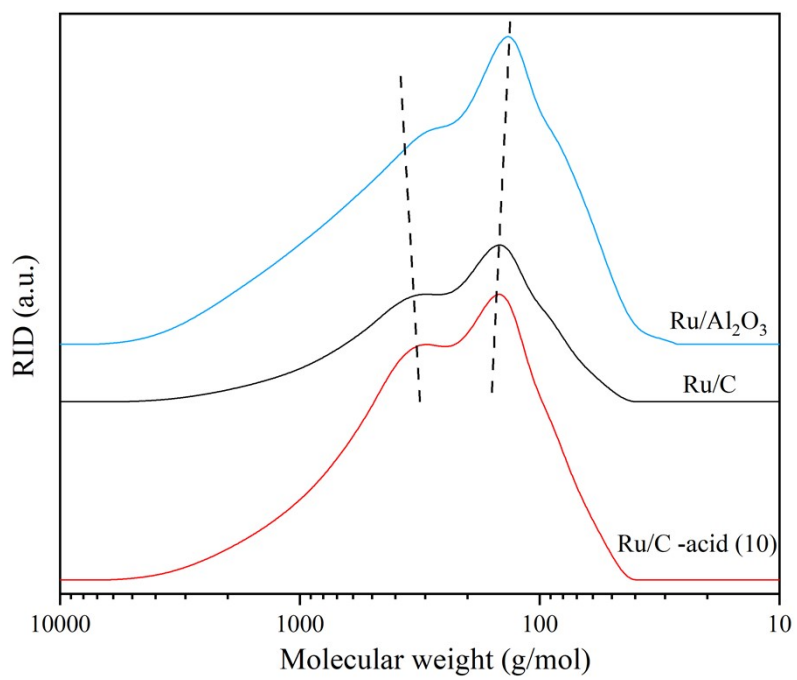

**Fig. S3.** GPC analysis of the nonvolatile products with different catalysts.



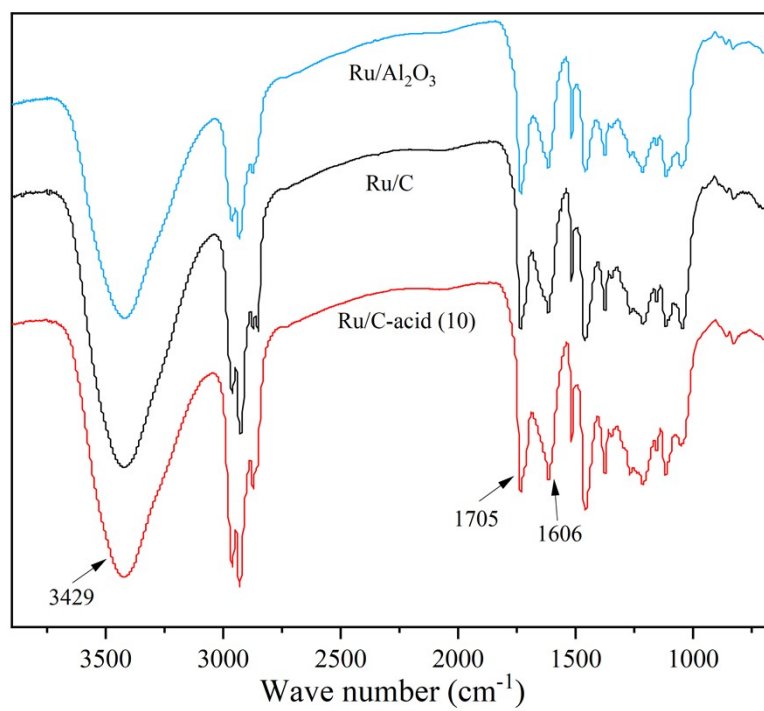

**Fig. S4.** FT-IR spectra of the nonvolatile products with different catalysts.
